# Supplementary material
Source: HighWire-hosted journal article supplement (http://thorax.bmj.com/highwire/filestream/174068/field_highwire_adjunct_files/2/Thorax_Table_116608.xls)
Supplement: Thorax_Table_116608.xls [file Thorax_Table_116608.xls]

## Sheet: Attachment 1B
Table E1: Details of the studies identified in databases and considered for inclusion in the meta-analysis
Protocol	Total N	Age range (yrs)	Median age (yrs)	Duration of double-blind therapy (days)	Background concurrent ICS allowed	Treatment regimen	Device	Number treated	Manuscript reference
ADA103575	724	15-76	34	28	N	Advair 50/100mcg BID + Fluticasone propionate 200mcg QD	DPI + Nasal spray	182	CTR
ADA103575						Advair 50/100mcg BID + Montelukast 10mg QD	DPI + ORAL	182
ADA103575						Advair 50/100mcg BID	DPI	180
ADA103575						Montelukast 10mg QD	ORAL	180
ADA103578	660	15-73	36	28	N	Advair 50/100mcg BID + Fluticasone propionate 200mcg QD	DPI + Nasal spray	168	CTR
ADA103578						Advair 50/100mcg BID + Montelukast 10mg QD	DPI + ORAL	165
ADA103578						Advair 50/100mcg BID	DPI	157
ADA103578						Montelukast 10mg QD	ORAL	170
B2C106093	55	19-70	43	14	Y	Novel LABA 100mcg QD	DPI	9	CTR
B2C106093						Novel LABA 25mcg QD	DPI	10
B2C106093						Novel LABA 400mcg QD	DPI	8
B2C106093						Placebo		13
B2C106093						Salmeterol 50mcg BID	DPI	15
B2E106359	54	21-69	46	14	Y	Novel LABA 10mcg QD	DPI	9	CTR
B2E106359						Novel LABA 15mcg QD	DPI	8
B2E106359						Novel LABA 20mcg QD	DPI	10
B2E106359						Placebo		14
B2E106359						Salmeterol 50mcg BID	DPI	13
DENB4003	34	Unk	44	42	Y	Salmeterol xinafoate 50mcg BID	Unk	15	Neilsen, et al. Respir Med 1999;93:863-868
DENB4003						Placebo		19
DENB4007	10	23-45	31	28	N	Salmeterol xinafoate 50mcg BID	DPI	10	GSK data only
DENB4007						Fluticasone propionate 500mcg BID	DPI	10
DENB4007						Placebo		10
FAS40008	282	18-65	40	364	N	Fluticasone propionate 250mcg BID	DPI	92	Lundback B, et al. Respir Med 2006;100:2-10
FAS40008						Salmeterol 50mcg BID	DPI	95
FAS40008						Advair 50/250mcg BID	DPI	95
FLIL28	177	16-75	51.6	168	N	Salmeterol 50mcg BID + Fluticasone 250mcg BID	MDI + MDI	89	GSK data only
FLIL28						Salmeterol 50mcg BID + Beclomethasone 500mcg BID	MDI + MDI	88
FLTA3015	136	12-62	28.5	28	N	Fluticasone propionate 100mcg BID	MDI	23	Pearlman DS, et al. Ann Allergy Asthma Immunol 1999;82(3):257-65
FLTA3015						Fluticasone propionate 250mcg BID	MDI	23
FLTA3015						Placebo		23
FLTA3015						Salmeterol 50mcg BID + Fluticasone 100mcg BID	MDI + MDI	25
FLTA3015						Salmeterol 50mcg BID + Fluticasone 250mcg BID	MDI + MDI	21
FLTA3015						Salmeterol xinafoate 50mcg BID	MDI	21
FLTA4021	350	12-77	39	84	N	Fluticasone propionate 250mcg BID	MDI	114	Baraniuk J, et al. Chest 1999;116(3):625-632
FLTA4021						Salmeterol 50mcg BID + Fluticasone 100mcg BID	MDI + MDI	118
FLTA4021						Triamcinolone acetonide 600mcg BID	MDI	118
FLTA4022	330	12-79	40	84	N	Fluticasone propionate 250mcg BID	MDI	109	Baraniuk J, et al. Chest 1999;116(3):625-632
FLTA4022						Salmeterol 50mcg BID + Fluticasone 100mcg BID	MDI + MDI	113
FLTA4022						Triamcinolone acetonide 600mcg BID	MDI	108
FMS40231	340	18-75	46.4	178	Y	Salmeterol xinafoate 50mcg BID + Fluticasone propionate variable BID	DPI + MDI	167	Pauwels RA, et al. Am J Respir Crit Care Med 1998;157:827-832
FMS40231						Salmeterol xinafoate 50mcg BID + Beclomethasone variable BID	DPI + MDI	173
SALBER01	225	18-76	44	21	Y	Salmeterol xinafoate 50mcg BID	MDI	113	GSK data only
SALBER01						Fenoterol/Ipratropium bromide 50/20mcg combo TID	MDI	112
SALMD/AH90/C80	119	18-79	47	84	Y	Salmeterol 100mcg BID	DPI	55	Boyd G, et al. Eur Respir J 1995;8:1494-1498
SALMD/AH90/C80						Placebo		64
SALMD/AH93/J119	241	4-10	7	14	Unk	Salmeterol 50mcg BID	DPI	126	CTR
SALMD/AH93/J119						Placebo		115
SALMI AH93 B126	14	20-58	32	3-5	Y	Salmeterol xinafoate 100mcg BID	MDI	8	Revill, et al. Respir Med 1998;92:1053-1058
SALMI AH93 B126						Albuterol 8mg BID	ORAL	6
SALMP/AH91/D89	208	4-16	10.3	84	Y	Salmeterol 50mcg BID	DPI	100	Russell G, et al. Ann Allergy Asthma Immunol 1995;75(5):423-428
SALMP/AH91/D89						Placebo		108
SAM102318	281	4-16	9.5	56	N	Advair 50/100mcg BID	DPI	137	GSK data only
SAM102318						Fluticasone propionate 200mcg BID	DPI	144
SAM103848	548	6-15	9.3	84	N	Advair 50/100mcg BID	DPI	281	Maspero J, et al. Clin Ther 2008;30:1492-1504
SAM103848						Montelukast 5mg QD	ORAL	267
SAM104926	303	4-11	8	84	N	Fluticasone propionate 200mcg BID	DPI	153	deBlic, et al. Ped Allergy Immunology 2008;19:1-9
SAM104926						Advair 50/100mcg BID	DPI	150
SAM30002	300	Unk	37.5	84	N	Advair 50/100mcg BID	DPI	148	CTR
SAM30002						Budesonide 400mcg BID	DPI	152
SAM30007	61	20-63	37	168	N	Fluticasone propionate variable	DPI	32	CTR
SAM30007						Advair variable	DPI	29
SAM30010	47	20-74	52	14	N	Fluticasone propionate 250mcg BID	DPI	23	CTR
SAM30010						Advair 50/250mcg BID	DPI	24
SAM30013	237	12-86	37	84	N	Fluticasone propionate 250mcg BID	MDI	116	CTR
SAM30013						Advair 50/100mcg BID	MDI	121
SAM30022	68	13-79	42	84	N	Beclomethasone dipropionate 400mcg BID	MDI	33	CTR
SAM30022						Advair 50/100mcg BID	MDI	35
SAM40004	63	18-50	33	476	N	Fluticasone propionate 100mcg BID	DPI	21	CTR
SAM40004						Placebo		5
SAM40004						Advair 50/100mcg BID	DPI	37
SAM40008	186	19-80	48	168	N	Fluticasone propionate variable	DPI	93	CTR
SAM40008						Advair variable	DPI	93
SAM40010	373	12-85	44	84	N	Formoterol 4.5mcg BID + Budesonide 200mcg BID	DPI + DPI	183	CTR
SAM40010						Advair 50/100mcg BID	DPI	190
SAM40012	548	4-11	8	168	N	Fluticasone propionate 100mcg BID	DPI	181	CTR
SAM40012						Fluticasone propionate 200mcg BID	DPI	186
SAM40012						Advair 50/100mcg BID	DPI	181
SAM40023	46	Unk	27.3	42	N	Salmeterol 50mcg BID + Fluticasone propionate 250mcg BID	DPI + DPI	14	Weersink JM, et al. Am J Respir Crit Care Med 1997;155:1241-46
SAM40023						Fluticasone propionate 250mcg BID	DPI	16
SAM40023						Salmeterol 50mcg BID	DPI	16
SAM40027	3416	9-83	40	364	N	Fluticasone propionate variable	DPI	1707	Bateman E, et al. Am J Respir Crit Care Med 2004;170(8):836-844
SAM40027						Advair variable	DPI	1709
SAM40030	66	20-50	35.5	84	N	Fluticasone propionate 100mcg BID + Montelukast 10mg QD	MDI + ORAL	33	Pavord I, et al. Respir Res 2007;8:67-73
SAM40030						Advair 50/100mcg BID	MDI	33
SAM40031	82	19-78	45.5	364	N	Fluticasone propionate variable	DPI	41	CTR
SAM40031						Advair variable	DPI	41
SAM40034	154	Unk	37.1	84	N	Advair 50/100mcg BID	DPI	75	CTR
SAM40034						Fluticasone propionate 250mcg BID	DPI	79
SAM40036	577	12-78	34	84	N	Budesonide 400mcg QD	DPI	289	CTR
SAM40036						Advair 50/100mcg QD	DPI	288
SAM40040	1391	18-91	47	168	N	Formoterol/Budesonide comb 4.5/160mcgx2 BID	DPI	697	Dahl R, et al. Respir Med 2006;100:1152-1162
SAM40040						Advair 50/250mcg BID	DPI	694
SAM40042	75	18-67	34	28	N	Formoterol/Budesonide comb 6/200mcg BID	DPI	38	Lotvall J, et al. Respir Res 2006;7:110
SAM40042						Advair 50/100mcg BID	DPI	37
SAM40048	247	19-78	48	84	N	Advair 50/250mcg BID	DPI	121	CTR
SAM40048						Formoterol/Budesonide comb 6/200mcg BID	DPI	126
SAM40049	145	18-78	35.5	168	N	Fluticasone propionate 100mcg BID	DPI	71	Strand AM, et al. Respir Med 2004:98:1008-1015
SAM40049						Advair 50/100mcg BID	DPI	74
SAM40056	688	18-74	45	364	N	Formoterol/Budesonide comb 6/200mcg AMD	DPI	344	Fitzgerald J, et al. Clinical Therapeutics 2005;27(4):393-406
SAM40056						Advair 50/250mcg BID	DPI	344
SAM40058	318	18-81	48	14	N	Advair 100/1000mcg BID	DPI	48	Adolfsson LE, et al. Clinical Drug Investigation 2005;25(4):231-241
SAM40058						Advair 100/500mcg BID	DPI	85
SAM40058						Advair 100/200mcg BID	DPI	75
SAM40058						Advair 50/500mcg BID	DPI	32
SAM40058						Advair 50/250mcg BID	DPI	41
SAM40058						Advair 50/100mcg BID	DPI	37
SAM40065	449	12-71	33	280	N	Advair variable BID	DPI	150	CTR
SAM40065						Fluticasone propionate variable BID	DPI	299
SAM40066	862	15-76	34	28	N	Advair 50/100mcg BID	DPI	289	Nathan RA, et al. Chest 2005;128:1910-1920
SAM40066						Advair 50/100mcg BID + Flonase 200mcg QD	DPI + Nasal spray	291
SAM40066						Advair 50/100mcg BID + Montelukast 10mg QD	DPI + ORAL	282
SAM40086	462	12-81	33	280	N	Advair variable BID	DPI	155	Koenig, et al. Respir Med 2008;102:665-73
SAM40086						Fluticasone propionate variable BID	DPI	307
SAM40088	475	18-82	45	168	N	Advair 50/100mcg BID	DPI	159	Godard P, et al. Respir Med 2008;102:1124-1131
SAM40088						Advair 50/250mcg BID	DPI	157
SAM40088						Fluticasone propionate 250mcg BID	DPI	159
SAM40090	483	12-79	40	84	N	Fluticasone propionate 250mcg BID	DPI	241	CTR
SAM40090						Advair 50/100mcg BID	DPI	242
SAM40092	42	33-48	40.5	42	N	Advair 50/100mcg BID	DPI	21	Prieto L, et al. Ann Allergy Asthma Immunol 2005;95:452-461
SAM40092						Fluticasone propionate 100mcg BID	DPI	21
SAM40100	24	4-11	7	42	N	Fluticasone propionate 200mcg BID	DPI	12	CTR
SAM40100						Advair 50/100mcg BID	DPI	12
SAM40101	32	6-15	9	14	N	Fluticasone propionate 100mcg BID	DPI	16	CTR
SAM40101						Advair 50/100mcg BID	DPI	16
SAM40104	39	22-65	37	28	N	Fluticasone propionate 100mcg BID	DPI	20	Houghton, et al. Resp Research 2008;online
SAM40104						Advair 50/100mcg BID	DPI	19
SAM40116	177	Unk	47.6	84	N	Advair variable BID	DPI	91	CTR
SAM40116						Fluticasone propionate variable BID	DPI	86
SAM40120	18	34-77	55.5	84	N	Advair 50/100mcg BID	MDI	8	CTR
SAM40120						Fluticasone propionate 250mcg BID	MDI	10
SAM49071	178	18-73	42	168	N	Advair 50/250mcg BID	DPI	88	GSK data only
SAM49071						Advair 50/500mcg BID	DPI	90
SAS30001	283	12-77	30	84	N	Advair 50/100mcg BID	MDI	95	Nelson HS, et al. Ann Allergy Asthma Immunol 2003;91:263-269
SAS30001						Fluticasone propionate 100mcg BID	MDI	97
SAS30001						Salmeterol xinafoate 50mcg BID	MDI	91
SAS30003	360	12-81	32.5	84	N	Advair 50/100mcg BID	MDI	92	Pearlman DS, et al. J Asthma 2004;41(8):797-806
SAS30003						Fluticasone propionate 100mcg BID	MDI	89
SAS30003						Placebo		87
SAS30003						Salmeterol xinafoate 50mcg BID	MDI	92
SAS30004	365	12-82	39	84	N	Advair 50/250mcg BID	MDI	94	Nathan RA, et al. Clinical Therapeutics 2006;28:73-85
SAS30004						Fluticasone propionate 250mcg BID	MDI	91
SAS30004						Placebo		89
SAS30004						Salmeterol xinafoate 50mcg BID	MDI	91
SAS30013	54	18-58	32	364	N	Advair 50/250mcg BID	DPI	27	Koopsman JG, et al. Thorax 2006;61:306-13.
SAS30013						Fluticasone propionate 250mcg BID	DPI	27
SAS30015	156	12-79	33	84	N	Beclomethasone dipropionate 200mcg BID	MDI	78	Angus R, et al. Int J Clin Pract 2005;59(2):156-162
SAS30015						Advair 50/100mcg BID	MDI	78
SAS30017	267	12-73	33	84	N	Advair 50/100mcg BID	DPI	88	Murray J, et al. Ann Allergy Asthma Immunol 2004;93(4):351-359
SAS30017						Fluticasone propionate 100mcg BID	DPI	89
SAS30017						Salmeterol xinafoate 50mcg BID	DPI	90
SAS30018	206	6-17	10.6	728	N	Advair variable BID	DPI	Unk	Nuijsink, et al. Eur Respir J 2007;30:457-466.
SAS30018						Fluticasone propionate variable	DPI	Unk
SAS30019	428	4-11	7	84	N	Advair 50/100mcg BID DPI	DPI	213	Bracamonte, et al. Clin Drug Invest 2005;25(1):1-11
SAS30019						Advair 50/100mcg BID MDI	MDI	215
SAS30021	908	4-11	8	84	N	Advair 50/100mcg QD	DPI	304	CTR
SAS30021						Fluticasone propionate 100mcg QD	DPI	304
SAS30021						Placebo		300
SAS30022	844	12-85	31	84	N	Advair 50/100mcg BID	DPI	210	Kerwin, et al. Resp Med 2008;102:495-504
SAS30022						Advair 50/250mcg QD	DPI	210
SAS30022						Fluticasone propionate 250mcg QD	DPI	212
SAS30022						Placebo		212
SAS30023	458	12-73	33	84	N	Fluticasone propionate 100mcg QD	DPI	154	Boonsawat, et al. Clin Drug Invest 2008;28(2):101-111
SAS30023						Placebo		155
SAS30023						Advair 50/100mcg QD	DPI	149
SAS30024	2258	12-78	32	364	N	Fluticasone propionate 100mcg BID	DPI	970	Chuchalin, et al. Clin Drug Invest 2008;28(3):169-181
SAS30024						Placebo		315
SAS30024						Advair 50/100mcg QD	DPI	973
SAS30031	203	4-11	8	84	N	Advair 50/100mcg BID	DPI	101	Malone R, et al. Ann Allergy Asthma Immunol 2005;95(1):66-71
SAS30031						Fluticasone propionate 100mcg BID	DPI	102
SAS30036	383	19-79	56	56	N	Fluticasone propionate 250mcg BID + Theophylline 200mg BID	DPI + ORAL	189	Adachi M, et al. Respir Med 2008;102:1055-1064. Adachi M, et al. Allergology & Immunology 2005;12(6):64-78
SAS30036						Advair 50/250mcg BID	DPI	194
SAS30039	362	12-78	38	84	N	Fluticasone propionate 250mcg BID	DPI	182	Rojas RA, et al. J Asthma 2007;44:437-41
SAS30039						Advair 50/250mcg BID	DPI	180
SAS30040	484	12-79	40.5	84	N	Fluticasone propionate 250mcg BID	DPI	238	Bateman ED, et al. J Allergy Clin Immunol 2006;117:563-570
SAS30040						Advair 50/100mcg BID	DPI	246
SAS40002	428	16-73	49	84	N	Formoterol 12mcg BID + Budesonide 800mcg BID	DPI + DPI	216	Ringdal N, et al. Respir Med 2002;96:851-861
SAS40002						Advair 50/250mcg BID	DPI	212
SAS40009	367	18-76	49.3	84	N	Advair 50/250mcg BID	DPI	180	Bergmann KC, et al. Swiss Med Wkly 2004;134:50-58
SAS40009						Fluticasone propionate 500mcg BID	DPI	187
SAS40013	12	Unk	39	364	N	Advair 50/250mcg BID	DPI	5	CTR
SAS40013						Fluticasone propionate 500mcg BID	DPI	7
SAS40015	805	14-79	43	84	N	Advair 50/100mcg BID	DPI	404	Ringdal N, et al. Respir Med 2003;97:234-241
SAS40015						Fluticasone propionate 100mcg BID + Montelukast 10mg QD	DPI + ORAL	401
SAS40018	447	15-83	42	84	N	Advair 50/100mcg BID	DPI	222	Nelson HS, et al. J Allergy Clin Immunol 2000;106(6):1088-1095
SAS40018						Fluticasone propionate 100mcg BID + Montelukast 10mg QD	DPI + ORAL	225
SAS40019	28	Unk	19.9	84	N	Advair 50/250mcg BID	DPI	14	Van den Toom LM, et al. Respir Med 2005;99(6):779-87
SAS40019						Placebo		14
SAS40020	432	15-83	34.2	84	N	Advair 50/100mcg BID	DPI	216	Pearlman DS, et al. Ann Allergy Asthma Immunol 2002;88:227-235.
SAS40020						Montelukast 10mg QD	ORAL	216
SAS40021	423	15-72	34.3	84	N	Advair 50/100mcg BID	DPI	211	Calhoun WJ, et al. Am J Respir Crit Care Med 2001;164(5):759-763.
SAS40021						Montelukast 10mg QD	ORAL	212
SAS40024	199	12-51	27	28	N	Advair 50/100mcg BID	DPI	99	CTR
SAS40024						Fluticasone propionate 100mcg BID	DPI	100
SAS40025	192	12-50	29	28	N	Advair 50/250mcg BID	DPI	102	Weiler JM, et al. Ann Allergy Asthma Immunol 2005;94:65-72
SAS40025						Fluticasone propionate 250mcg BID	DPI	90
SAS40026	574	12-85	40.3	84	N	Advair 50/100mcg BID	DPI	295	Jarjour NN, et al. J Allergy Clin Immunol 2006;118:44-52
SAS40026						Fluticasone propionate 250mcg BID	DPI	279
SAS40027	558	12-77	38	84	N	Advair 50/100mcg BID	DPI	281	Busse W, et al. J Allergy Clin Immunol 2003;111:57-65.
SAS40027						Fluticasone propionate 250mcg BID	DPI	277
SAS40029	137	Unk	30	21	N	Advair 50/500mcg BID	DPI	69	Rowe, et al. Acad Emerg Med 2007;14:833-840
SAS40029						Fluticasone propionate 500mcg BID	DPI	68
SAS40036	647	15-83	41.5	112	N	Advair 50/100mcg BID	DPI	172	Koenig, et al. J Asthma 2008;45:681-87
SAS40036						Fluticasone propionate 100mcg BID	DPI	159
SAS40036						Montelukast 10mg QD	ORAL	164
SAS40036						Salmeterol xinafoate 50mcg BID	DPI	152
SAS40037	641	15-88	42	112	N	Advair 50/100mcg BID	DPI	161	CTR
SAS40037						Fluticasone propionate 100mcg BID	DPI	161
SAS40037						Montelukast 10mg QD	ORAL	159
SAS40037						Salmeterol xinafoate 50mcg BID	DPI	160
SAS40068	532	12-77	34.6	168	N	Advair 50/100mcg BID	DPI	262	CTR
SAS40068						Fluticasone propionate 100mcg BID	DPI	270
SERL03	349	12-76	33	84	N	Budesonide 400mcg BID	DPI	173	Johansson G, et al. Am J Respir Crit Care Med 1999;159(3 part 2):A637
SERL03						Advair 50/100mcg BID	DPI	176
SERL04	353	14-80	47	168	N	Budesonide 800mcg BID	DPI	173	Jenkins C, et al. Respir Med 2000;94(7):715-723
SERL04						Advair 50/250mcg BID	DPI	180
SFA100062	544	12-74	30	112	N	Advair 50/100mcg BID	DPI	272	CTR
SFA100062						Salmeterol xinafoate 50mcg BID	DPI	272
SFA100314	248	4-17	11	28	N	Advair 50/100mcg BID	DPI	124	Pearlman, et al. Pediatr Pulm 2009;44:429-35
SFA100314						Fluticasone propionate 100mcg BID	DPI	124
SFA100316	231	4-17	12	28	N	Advair 50/100mcg BID	DPI	113	CTR
SFA100316						Fluticasone propionate 100mcg BID	DPI	118
SFA103153	475	12-63	32	364	N	Advair 50/100mcg BID	DPI	239	Bailey W, et al. CMRO 2008;24:1669-82.
SFA103153						Fluticasone propionate 100mcg BID	DPI	236
SFCA3002	356	12-70	38	84	N	Advair 50/100mcg BID	DPI	92	Kavuru M, et al. J Allergy Clin Immunol 2000;150(6):1108-1116.
SFCA3002						Fluticasone propionate 100mcg BID	DPI	90
SFCA3002						Placebo		82
SFCA3002						Salmeterol xinafoate 50mcg BID	DPI	92
SFCA3003	349	12-69	39	84	N	Advair 50/250mcg BID	DPI	84	Shapiro G, et al. Am J Respir Crit Care Med 2000; 161 (21): 527-534
SFCA3003						Fluticasone propionate 250mcg BID	DPI	84
SFCA3003						Placebo		93
SFCA3003						Salmeterol xinafoate 50mcg BID	DPI	88
SFCB3017	244	12-78	33	84	N	Salmeterol 50mcg BID + Fluticasone propionate 100mcg BID	DPI + DPI	123	Bateman ED, et al. Clin Drug Invest 1998;16(3):193-201
SFCB3017						Advair 50/100mcg BID	DPI	121
SFCB3018	371	13-75	42	196	N	Salmeterol 50mcg BID + Fluticasone propionate 250mcg BID	DPI + DPI	191	Chapman KR, et al. Can Respir J 1999;6(1):45-51
SFCB3018						Advair 50/250mcg BID	DPI	180
SFCB3019	503	12-79	48	196	N	Fluticasone propionate 500mcg BID	DPI	165	Aubier M, et al. Respir Med 1999;93(12):876-884
SFCB3019						Salmeterol 50mcg BID + Fluticasone propionate 500mcg BID	DPI + DPI	171
SFCB3019						Advair 50/500mcg BID	DPI	167
SFCB3020	257	4-11	8	84	N	Salmeterol 50mcg BID + Fluticasone propionate 100mcg BID	DPI + DPI	132	Van den Berg NJ, et al. Pediatr Pulmonol 2000;30(2):97–105
SFCB3020						Advair 50/100mcg BID	DPI	125
SFCB3022	497	11-79	40	84	N	Fluticasone propionate 100mcg BID	MDI	165	Bateman ED, et al. Respir Med 2001;95(3):136-146
SFCB3022						Advair 50/100mcg BID DPI	DPI	167
SFCB3022						Advair 50/100mcg BID MDI	MDI	165
SFCB3023	509	12-82	49	84	N	Fluticasone propionate 500mcg BID	MDI	172	van Noord JA, et al. Clin Drug Invest 2001;21(4):243-255
SFCB3023						Advair 50/500mcg BID DPI	DPI	161
SFCB3023						Advair 50/500mcg BID MDI	MDI	176
SFCF3001	270	11-77	36	84	N	Advair 50/250mcg BID DPI	DPI	137	CTR
SFCF3001						Advair 50/250mcg BID DPI	DPI	133
SFCF3002	346	4-14	8	84	N	Advair 50/100mcg BID DPI	DPI	170	CTR
SFCF3002						Advair 50/100mcg BID DPI	DPI	176
SLD311	239	12-75	27	84	Y	Albuterol 180mcg QID	MDI	80	Kemp J, et al. Clin Ther 1998;20(2):270-282
SLD311						Placebo		79
SLD311						Salmeterol xinafoate 50mcg BID	DPI	80
SLD312	212	12-69	31	84	Y	Albuterol 180mcg QID	MDI	70	Kemp J, et al. Clin Ther 1998;20(2):270-282
SLD312						Placebo		73
SLD312						Salmeterol xinafoate 50mcg BID	DPI	69
SLD320	352	12-67	29	364	Y	Placebo		176	Kemp JP, et al. J Allergy Clin Immunol 1999;104(6):1189-1197; Chervinsky P, et al. Chest 1999;115:642-648
SLD320						Salmeterol xinafoate 50mcg BID	DPI	176
SLD390	207	4-11	9	84	Y	Placebo		105	Weinstein SF, et al. Ann Allergy Asthma Immunol 1998;81(1):51-58
SLD390						Salmeterol xinafoate 50mcg BID	DPI	102
SLG201	160	12-60	21	7	N	Placebo		35	Bronsky EA, et al. Chest 1994;105(4):1032-1037
SLG201						Salmeterol hydroxynapthoate 100mcg BID	MDI	31
SLG201						Salmeterol hydroxynapthoate 12mcg BID	MDI	29
SLG201						Salmeterol hydroxynapthoate 25mcg BID	MDI	32
SLG201						Salmeterol hydroxynapthoate 50mcg BID	MDI	33
SLG290	243	4-11	9	7	Y	Placebo		82	Weinstein S, et al. J Asthma 1997;34(1):43-52
SLG290						Salmeterol xinafoate 25mcg BID	MDI	82
SLG290						Salmeterol xinafoate 50mcg BID	MDI	79
SLG311	234	12-73	22	84	Y	Albuterol 180mcg QID	MDI	77	Pearlman DS, et al. NEJM 1992;327(2):1420-1425
SLG311						Placebo		79
SLG311						Salmeterol hydroxynapthoate 50mcg BID	MDI	78
SLG312	322	12-69	27	84	Y	Albuterol 180mcg QID	MDI	108	D'Alonzo GE, et al. J Am Med Assoc 1994;271(18):1412-1416
SLG312						Placebo		108
SLG312						Salmeterol hydroxynapthoate 50mcg BID	MDI	106
SLG400	405	12-86	36	280-308	Y	Placebo		256	Adinoff AD, et al. J Fam Pract1998;47(4):278-284
SLG400						Salmeterol xinafoate 50mcg BID	MDI	149
SLG410	238	12-74	31	84	Y	Placebo		77	Pollard SJ, et al. Ann Allergy Asthma Immunol 1997;78(5):457-464
SLG410						Salmeterol xinafoate 50mcg BID	MDI	78
SLG410						Theophylline BID	ORAL	83
SLG411	246	12-80	31	84	Y	Placebo		83	Pollard SJ, et al. Ann Allergy Asthma Immunol 1997;78(5):457-464
SLG411						Salmeterol xinafoate 50mcg BID	MDI	84
SLG411						Theophylline BID	ORAL	79
SLGA2004	210	12-75	31.5	28	Y	Placebo		69	CTR
SLGA2004						Salmeterol xinafoate 50mcg BID	DPI	141
SLGA3010	240	12-68	31.5	84	Y	Placebo		81	Wolfe J, et al. Ann Allergy Asthma Immunol 2000;84(3):334-340
SLGA3010						Salmeterol xinafoate 50mcg BID DPI	DPI	79
SLGA3010						Salmeterol xinafoate 50mcg BID MDI	MDI	80
SLGA3011	258	12-79	31	84	Y	Placebo		86	Wolfe J, et al. Ann Allergy Asthma Immunol 2000;84(3):334-340
SLGA3011						Salmeterol xinafoate 50mcg BID DPI	DPI	86
SLGA3011						Salmeterol xinafoate 50mcg BID MDI	MDI	86
SLGA3014	449	4-11	9	84	Y	Albuterol 200mcg QID	DPI	115	GSK data only
SLGA3014						Placebo		110
SLGA3014						Salmeterol xinafoate 25mcg BID	DPI	115
SLGA3014						Salmeterol xinafoate 50mcg BID	DPI	109
SLGA5001	254	12-82	44	84	Y	Placebo		128	Kemp JP, et al. J Allergy Clin Immunol 1998;101(2 I):188-195
SLGA5001						Salmeterol xinafoate 50mcg BID	MDI	126
SLGA5002	271	12-85	41	84	Y	Placebo		136	Kemp JP, et al. JACI 1998;101(2 I):188-195.
SLGA5002						Salmeterol xinafoate 50mcg BID	MDI	135
SLGA5003	285	12-83	34	84	Y	Albuterol 180mcg QID	MDI	145	Wenzel SE, et al. Ann Allergy Asthma Immunol 1998;80(6):463-470
SLGA5003						Salmeterol xinafoate 50mcg BID	MDI	140
SLGA5004	278	12-82	33	84	Y	Albuterol 180mcg QID	MDI	139	Wenzel SE, et al. Ann Allergy Asthma Immunol 1998;80(6):463-470
SLGA5004						Salmeterol xinafoate 50mcg BID	MDI	139
SLGA5005	277	12-75	35	84	Y	Placebo		140	Busse WW, et al. Am J Man Care 1998;4(11):1579-1587
SLGA5005						Salmeterol xinafoate 50mcg BID	MDI	137
SLGA5006	260	12-80	36	84	Y	Placebo		134	Busse WW, et al. Am J Man Care 1998;4(11):1579-1587
SLGA5006						Salmeterol xinafoate 50mcg BID	MDI	126
SLGA5007	240	12-76	41	84	N	Placebo		117	Lockey RF, et al. Chest 1999;115(3):666-673
SLGA5007						Salmeterol xinafoate 50mcg BID	MDI	123
SLGA5008	234	12-72	38	84	N	Placebo		117	Lockey RF, et al. Chest 1999;115(3):666-673
SLGA5008						Salmeterol xinafoate 50mcg BID	MDI	117
SLGA5009	19	19-58	32	14	Y	Salmeterol xinafoate 50mcg BID	MDI	6	GSK data only
SLGA5009						Placebo		7
SLGA5009						Theophylline variable dose	ORAL	6
SLGA5011	26355	9-100	38	196	Y	Placebo		13179	Nelson HS, et al. Chest 2006;129(1):15-26
SLGA5011						Salmeterol xinafoate 50mcg BID	MDI	13176
SLGA5013	205	12-70	27	168	N	Placebo		102	Rosenthal RR, et al. Chest 1999;116(3):595-602
SLGA5013						Salmeterol xinafoate 50mcg BID	MDI	103
SLGA5014	203	12-73	26	168	N	Placebo		104	Rosenthal RR, et al. Chest 1999;116(3):595-602
SLGA5014						Salmeterol xinafoate 50mcg BID	MDI	99
SLGA5015	331	12-72	29	182	N	Beclomethasone dipropionate 84mcg QID	MDI	107	GSK data only
SLGA5015						Placebo		114
SLGA5015						Salmeterol xinafoate 50mcg BID	MDI	110
SLGA5016	386	12-69	27.5	182	N	Beclomethasone dipropionate 84mcg QID	MDI	129	Nathan RA, et al. Ann Allergy Asthma Immunol 1999;82(6):521-529
SLGA5016						Placebo		129
SLGA5016						Salmeterol xinafoate 50mcg BID	MDI	128
SLGA5017	483	18-77	41	168	Y	Beclomethasone dipropionate 336mcg BID	MDI	244	Kelson SG, et al. J Asthma 1999;36:703-715
SLGA5017						Salmeterol 50mcg BID + Beclomethasone 168mcg BID	MDI + MDI	239
SLGA5018	514	18-82	42	168	Y	Beclomethasone dipropionate 336mcg BID	MDI	254	Murray JJ, et al. Allergy and Asthma Proc 1999;20:173-180
SLGA5018						Salmeterol 50mcg BID + Beclomethasone 168mcg BID	MDI + MDI	260
SLGA5019	24	20-63	39.5	28	Y	Placebo		12	Nelson HS, et al. Am J. Respir Crit Care Med 1999;159(5 I):1556-1561
SLGA5019						Salmeterol xinafoate 50mcg BID	MDI	12
SLGA5020	28	20-56	30	28	N	Placebo		14	Nelson HS, et al. Am J. Respir Crit Care Med 1999;159(5 I):1556-1561
SLGA5020						Salmeterol xinafoate 50mcg BID	MDI	14
SLGA5021	489	12-77	36	168	N	Fluticasone propionate 250mcg BID	MDI	243	GSK data only
SLGA5021						Salmeterol 50mcg BID + Fluticasone 100mcg BID	MDI + MDI	246
SLGA5022	437	12-74	35	168	N	Fluticasone propionate 250mcg BID	MDI	216	Condemi JJ, et al. Ann Allergy Asthma Immunol 1999;82:383-389
SLGA5022						Salmeterol 50mcg BID + Fluticasone 100mcg BID	MDI + MDI	221
SLGA5024	313	12-73	38	28	Y	Salmeterol xinafoate 50mcg BID	MDI	156	Busse W, et al. J Allergy Clin Immunol 1999;103:1075-1080
SLGA5024						Zafirlukast 20mg BID	ORAL	157
SLGA5025	268	12-80	39	28	Y	Salmeterol xinafoate 50mcg BID	MDI	133	CTR
SLGA5025						Zafirlukast 20mg BID	ORAL	135
SLGB3003	395	18-76	43	364	Y	Salmeterol 50mcg BID MDI	MDI	196	CTR
SLGB3003						Salmeterol 50mcg BID MDI	MDI	199
SLGB3005	407	4-15	11	364	Y	Salmeterol 50mcg BID MDI	MDI	196	CTR (SLPT18)
SLGB3005						Salmeterol 50mcg BID MDI	MDI	211
SLGB3006	380	12-70	39	28	Y	Salmeterol 50mcg BID DPI	DPI	190	Boulet LP, et al. Journal of Asthma 1995;32(6):429-36
SLGB3006						Salmeterol 50mcg BID DPI	DPI	190
SLGB3008	418	16-88	49	28	Y	Salmeterol 50mcg BID MDI	MDI	211	CTR
SLGB3008						Salmeterol 50mcg BID MDI	MDI	207
SLGB3009	347	16-80	46	28	Y	Salmeterol 50mcg BID MDI	MDI	174	CTR
SLGB3009						Salmeterol 50mcg BID MDI	MDI	173
SLGB3015	45	21-73	52	365	Y	Placebo		14	GSK data only
SLGB3015						Salmeterol 100mcg BID	MDI	16
SLGB3015						Salmeterol 50mcg BID	MDI	15
SLGB3016	45	5-14	9	28	Y	Albuterol 200mcg QID	DPI	17	Byrnes C. Thorax 2000;55:780-784.
SLGB3016						Salmeterol 100mcg BID	DPI	13
SLGB3016						Salmeterol 50mcg BID	DPI	15
SLGB3019	426	5-15	10	364	Y	Placebo		206	Von Berg A, et al. Respir Med 1998;92:292-299
SLGB3019						Salmeterol 50mcg BID	DPI	220
SLGB3020	388	18-78	35	168	N	Salmeterol xinafoate 50mcg BID	MDI	193	GSK data only
SLGB3020						Beclomethasone 200mcg BID	MDI	195
SLGB3021	80	18-60	36.5	112	N	Salmeterol xinafoate 50mcg BID	DPI	20	Lindqvist A, et al. J Allergy Clin Immunol 2003;112:23-28
SLGB3021						Fluticasone propionate 250mcg BID	DPI	20
SLGB3021						Cromolyn 5mg QID	MDI	20
SLGB3021						Placebo		20
SLGB3024	165	18-64	38	168	Y	Placebo		56	Taylor, et al Thorax 1998;53:744-752
SLGB3024						Albuterol 400mcg QID	DPI	54
SLGB3024						Salmeterol 50mcg BID	DPI	55
SLGB3025	16	20-66	44	14	Y	Salmeterol 50mcg BID	DPI	8	Selby C, et al. AJRCCM 1997;155:104-08
SLGB3025						Theophylline variable BID	ORAL	8
SLGB3027	241	6-14	9	364	N	Beclomethasone dipropionate 200mcg BID	DPI	81	Simons FES, et al. N Engl J Med 1997;337:1659-1665
SLGB3027						Placebo		80
SLGB3027						Salmeterol 50mcg BID	DPI	80
SLGB4010	496	16-75	45	168	N	Fluticasone propionate 250mcg BID	MDI	160	Ind PW, et al. Respir Med 2003;97:555-62
SLGB4010						Fluticasone propionate 500mcg BID	MDI	165
SLGB4010						Salmeterol 50mcg BID + Fluticasone 250mcg BID	MDI + MDI	171
SLGB4011	34	5-16	9.8	21	Y	Salmeterol xinafoate 50mcg BID	DPI	17	CTR
SLGB4011						Placebo		17
SLGB4014	176	5-16	10	378	N	Beclomethasone dipropionate 200mcg BID	DPI	56	Verberne AAPH, et al. Am J Respir Crit Care Med 1998;158:213-219
SLGB4014						Beclomethasone dipropionate 400mcg BID	DPI	60
SLGB4014						Salmeterol 50mcg BID + Beclomethasone dipropionate 200mcg BID	DPI + DPI	60
SLGB4015	67	6-16	10	378	N	Beclomethasone dipropionate 200mcg BID	DPI	35	Verberne AAPH, et al. Am J Respir Crit Care Med 1997;156:688-695
SLGB4015						Salmeterol 50mcg BID	DPI	32
SLGB4021	95	8-12	10	84	Y	Salmeterol xinafoate 50mcg BID	DPI	44	GSK data only
SLGB4021						Placebo		51
SLGF35	1	N/A	48	168	N	Salmeterol xinafoate 50mcg BID	DPI	1	GSK data only
SLGF35						Placebo		1
SLGF75	46	Unk	38.9	84	N	Salmeterol 50mcg BID + Fluticasone propionate 100mcg BID	DPI + DPI	14	CTR
SLGF75						Fluticasone propionate 100mcg BID	DPI	17
SLGF75						Fluticasone propionate 250mcg BID	DPI	15
SLGH09	21	18-60	42	14	Y	Salmeterol xinafoate 50mcg BID	MDI	8	Fitzpatrick, et al. BMJ 1990; 301:1365-1368
SLGH09						Salmeterol xinafoate 100mcg BID	MDI	6
SLGH09						Placebo		7
SLGH10	13	26-69	61	13	Y	Albuterol 200mcg QID	MDI	7	Ullman A, et al. Am Rev Resp Dis 1990;142(3):571-575.
SLGH10						Salmeterol 50mcg BID	MDI	6
SLGH19	12	21-45	32	28	N	Salmeterol xinafoate 50mcg BID	MDI	6	GSK data only
SLGH19						Placebo		6
SLGH31	29	21-67	42	14	Y	Placebo		10	GSK data only
SLGH31						Salmeterol 100mcg BID	MDI	10
SLGH31						Salmeterol 50mcg BID	MDI	9
SLGH32	6	29-63	47.3	42	Y	Salmeterol 100mcg BID	MDI	6	GSK data only
SLGH32						Placebo		6
SLGH35	12	21-36	23.5	28	Y	Placebo		6	Ramage L, et al. Resp Med 1994;88:363-8.
SLGH35						Salmeterol 50mcg BID	MDI	6
SLGH36	12	28-69	54.5	28	N	Placebo		6	GSK data only
SLGH36						Salmeterol 100mcg BID	MDI	6
SLGH37	26	20-54	30.5	42	N	Placebo		12	Roberts JA, et al. Eur Respir J 1999;14(2):275-82.
SLGH37						Salmeterol 50mcg BID	MDI	14
SLGH39	9	26-64	40	56	Y	Placebo		5	Gardiner PV, et al. Am J Respir Crit Care Med 1994;150(4):1006-11.
SLGH39						Salmeterol 50mcg BID	MDI	4
SLGH40	26	19-64	40	56	Y	Placebo		13	Booth H, et al. Thorax 1993;48:1121-24.
SLGH40						Salmeterol 50mcg BID	MDI	13
SLGL19	128	17-76	40	84	Y	Salmeterol xinafoate 50mcg BID	DPI	Unk	GSK data only
SLGL19						Albuterol 400mcg QID	DPI	Unk
SLGL24	149	Unk	44.3	56	Y	Salmeterol xinafoate 50mcg BID	MDI	75	CTR
SLGL24						Albuterol 200mcg QID	MDI	74
SLGL26	25	18-67	41.7	70	Y	Salmeterol xinafoate 50mcg BID	DPI	13	GSK data only
SLGL26						Albuterol 400mcg QID	DPI	12
SLGL46	76	18-71	43	35	Y	Salmeterol 50mcg BID	MDI	37	GSK data only
SLGL46						Theophylline QD	ORAL	39
SLGL82	90	13-73	42.5	28	Unk	Salmeterol 50mcg BID	MDI	45	CTR
SLGL82						Placebo		45
SLGL92	21	Unk	52.4	42	Y	Salmeterol 50mcg BID	DPI	21	GSK data only
SLGL92						Placebo		21
SLGQ04	Unk	18-70	38.3	14	Unk	Salmeterol 50mcg BID	DPI	Unk	GSK data only
SLGQ04						Albuterol 400mcg BID	DPI	Unk
SLGQ08	40	Unk	37	56	N	Salmeterol 50mcg BID + Beclomethasone dipropionate 400mcg BID	DPI + DPI	12	Grutters JC, et al. Eur Respir 1999;14:915-22.
SLGQ08						Beclomethasone dipropionate 400mcg BID	DPI	15
SLGQ08						Salmeterol 50mcg BID	DPI	13
SLGQ32	Unk	Unk	Unk	21	Y	Salmeterol 50mcg BID	MDI	Unk	GSK data only
SLGQ32						Theophylline QD	ORAL	Unk
SLGQ39	5	18-65	32.6	182	Y	Salmeterol xinafoate 50mcg BID	DPI	3	GSK data only
SLGQ39						Beclomethasone 400mcg BID	DPI	2
SLGQ42	20	19-58	41.8	28	Y	Salmeterol xinafoate 50mcg BID	DPI	20	Norhaya, et al. Respirology 1999;4:77-81
SLGQ42						Placebo		20
SLGQ47	141	18-82	39.5	168	Y	Salmeterol 50mcg BID	MDI	72	GSK data only
SLGQ47						Placebo		69
SLGQ78	427	18-80	38.5	42	Y	Salmeterol xinafoate 50mcg BID	DPI	282	Jones, et al. Thorax 1994;49:971-975
SLGQ78						Placebo		145
SLGQ85	429	18-75	48	182	N	Salmeterol 50mcg BID + Beclomethasone dipropionate 200mcg BID	DPI + MDI	221	Greening AP, et al. Lancet 1994;344:219-224
SLGQ85						Beclomethasone dipropionate 500mcg BID	MDI	208
SLGQ94	911	17-86	45	168	Y	Placebo		456	D’Urzo AD, et al. Chest 2001;119:714-719
SLGQ94						Salmeterol 50mcg BID	MDI	455
SLGQ98	56	Unk	41.7	84	N	Salmeterol 50mcg BID + Fluticasone propionate 200mcg BID	DPI + DPI	18	Wallin A, et al. J Allergy Clin Immunol 2003:112:72-78
SLGQ98						Fluticasone propionate 200mcg BID	DPI	19
SLGQ98						Fluticasone propionate 500mcg BID	DPI	19
SLGS02	16	21-50	24.5	14	N	Placebo		9	Yates DH, et al. Am J Respir Crit Care Med 1997;156:988-91.
SLGS02						Salmeterol 50mcg BID	DPI	7
SLGS04	45	20-70	37.7	84	Y	Salmeterol 50mcg BID	DPI	13	Li X, et al. Am J Respir Crit Care Med 1999;160:1493-1499
SLGS04						Fluticasone propionate 100mcg BID	DPI	16
SLGS04						Placebo		16
SLGT01	692	17-70	42	28	Y	Placebo		172	Dahl R, et al. Eur Respir J 1991;4:1178-1184.
SLGT01						Salmeterol 100mcg BID	MDI	175
SLGT01						Salmeterol 12.5mcg BID	MDI	174
SLGT01						Salmeterol 50mcg BID	MDI	171
SLGT02	719	18-81	49	84	Y	Albuterol 200mcg QID	MDI	358	Britton MG, et al. Eur Respir J 1992;5(9):1062-1067
SLGT02						Salmeterol 50mcg BID	MDI	361
SLGT03	153	18-75	51	14	Y	Salmeterol 50mcg BID	MDI	78	Fjellbirkland L, et al. Respir Med 1994;88:599-607.
SLGT03						Theophylline variable BID	ORAL	75
SLGT04	314	20-80	56	84	Y	Salmeterol 100mcg BID	MDI	156	Palmer JBD, et al. Respir Med 1992;86(5):409-417
SLGT04						Salmeterol 50mcg BID	MDI	158
SLGT05	138	18-79	48	14	Y	Salmeterol 50mcg BID DPI	DPI	69	CTR
SLGT05						Salmeterol 50mcg BID MDI	MDI	69
SLGT06	449	18-79	44	84	Y	Albuterol 400mcg QID	DPI	229	Lundback B, et al. Thorax 1993;48:148-153
SLGT06						Salmeterol 50mcg BID	DPI	220
SLGT07	54	18-69	40.5	21	N	Placebo		27	GSK data only
SLGT07						Salmeterol 50mcg BID	MDI	27
SLGT08	41	20-69	48	21	Y	Placebo		13	Faurschou P, et al. Allergy 1994;49:827-832
SLGT08						Salmeterol 100mcg QD	MDI	14
SLGT08						Salmeterol 50mcg BID	MDI	14
SLGT11	21	64-83	74	21	Y	Placebo		11	CTR
SLGT11						Salmeterol 50mcg BID	MDI	10
SLGT12	28	64-88	74	28	Y	Placebo		13	Starke ID, et al. Age and Ageing 1996;25(1):67-71
SLGT12						Salmeterol 50mcg BID	MDI	15
SLGT13	68	3-15	10.5	14	Y	Placebo		23	Verberne AA, et al. J Allergy Clin Immunol 1996;97(4):938-46
SLGT13						Salmeterol 25mcg BID	MDI	45
SLGT14	Unk	Unk	Unk	14	Y	Salmeterol 50mcg BID	MDI	Unk	GSK data only
SLGT14						Salmeterol 50mcg BID	DPI	Unk
SLGT16	189	17-78	43	28	Y	Salmeterol 50mcg BID	DPI	92	Paggiaro PL, et al. Eur Respir J 1996;9:1689–95
SLGT16						Theophylline variable BID	ORAL	97
SLGT18	121	18-79	44	14	Y	Ketotifen 1mg BID	ORAL	62	CTR
SLGT18						Salmeterol 50mcg BID	MDI	59
SLGT23	24	18-45	24.8	56	N	Salmeterol xinafoate 50mcg BID	MDI	12	Cheung, et al. NEJM 1992;327:1198-1203
SLGT23						Placebo		12
SLGT25	190	18-80	52.5	42	Y	Albuterol 400mcg QID	DPI	94	Faurschou P, et al. Eur Respir J 1996;9:1885-1890
SLGT25						Salmeterol 100mcg BID	DPI	96
SLGT26	738	17-79	45	168	N	Beclomethasone dipropionate 1000mcg BID	MDI	251	Woolcock A, et al. Am J Respir Crit Care Med 1996;153:1481–1488
SLGT26						Salmeterol 100mcg BID + Beclomethasone dipropionate 500mcg BID	MDI + MDI	244
SLGT26						Salmeterol 50mcg BID + Beclomethasone dipropionate 500mcg BID	MDI + MDI	243
SLGT27	101	19-60	41	169	Y	Placebo		50	Wilding P, et al. Br Med J 1997;314:1441–1446.
SLGT27						Salmeterol 50mcg BID	DPI	51
SLGT31	20	20-55	31.3	42	N	Salmeterol xinafoate 50mcg BID	DPI	20	Jeffrey, et al. Eur Respir J 2002;20:1378-1385
SLGT31						Fluticasone propionate 250mcg BID	DPI	18
SLGT31						Placebo		19
SLGT32	18	18-55	Unk	42	N	Salmeterol xinafoate 50mcg BID	DPI	Unk	GSK data only
SLGT32						Fluticasone propionate 500mcg BID	DPI	Unk
SLGT32						Placebo		Unk	GSK data only
SLM9042	Unk	Unk	Unk	Unk	Unk	Salmeterol 50mcg BID	Unk	Unk
SLMP03	24	Unk	9.7	56	Y	Salmeterol 50mcg BID	DPI	11	CTR
SLMP03						Placebo		13
SLPH01	9	10-14	13	28	Y	Placebo		5	CTR
SLPH01						Salmeterol 50mcg BID	DPI	4
SLPL03	40	7-16	10.9	112	Y	Salmeterol xinafoate 50mcg BID	DPI	20	GSK data only
SLPL03						Placebo		20
SLPT01	388	4-16	10	365	Y	Albuterol 200mcg BID	MDI	128	Lenney W, et al. Eur J Pediatr 1995;154:983-990.
SLPT01						Salmeterol 25mcg BID	MDI	127
SLPT01						Salmeterol 50mcg BID	MDI	133
SLPT02	473	3-16	10	365	Y	Albuterol 200mcg BID	DPI	156	Lenney W, et al. Eur J Pediatr 1995;154:983-990.
SLPT02						Salmeterol 25mcg BID	DPI	157
SLPT02						Salmeterol 50mcg BID	DPI	160
SLPT03	162	5-16	11	14	Y	Salmeterol 50mcg BID DPI	DPI	81	Gustafsson PM, et al. Eur J Clin Res 1994;5:63-73
SLPT03						Salmeterol 50mcg BID MDI	MDI	81
SLPT06	3	5-13	9.3	28	Y	Salmeterol xinafoate 50mcg BID	DPI	3	GSK data only
SLPT06						Theophylline 200mcg BID	ORAL	3
SLPT07	91	6-15	11	168	Y	Placebo		51	Zarkovic J, et al. Clin Drug Invest 1998;15(3):169-175.
SLPT07						Salmeterol 50mcg BID	DPI	40
SLPT17	23	12-17	14	42	Y	Placebo		12	Johnston SL, et al. Eur J Clin Res 1997;9:33-45.
SLPT17						Salmeterol 100mcg BID	DPI	11
SLPX01	30	5-15	12	168	Y	Placebo		15	GSK data only
SLPX01						Salmeterol 50mcg BID	DPI	15
SMO30006	572	12-87	48	84	Y	Salmeterol 50mcg BID MDI	MDI	294	Chopra N, et al. Respir Med 2005;99:S1-S10
SMO30006						Salmeterol 50mcg BID MDI	MDI	278
SMO30007	546	4-11	7	84	Y	Salmeterol 50mcg BID MDI	MDI	272	Chopra N, et al. Respir Med 2005;99:S1-S10
SMO30007						Salmeterol 50mcg BID MDI	MDI	274
SMS20009	10	20-39	30.5	42	N	Salmeterol xinafoate 50mcg BID	MDI	5	GSK data only
SMS20009						Placebo		5
SMS20010	43	2-3	2	35	Y	Placebo		10	CTR
SMS20010						Salmeterol xinafoate 25mcg BID	MDI	12
SMS20010						Salmeterol xinafoate 25mcg TID	MDI	11
SMS20010						Salmeterol xinafoate 50mcg BID	MDI	10
SMS20011	45	0-1	1	35	Y	Placebo		11	CTR
SMS20011						Salmeterol xinafoate 25mcg BID	MDI	12
SMS20011						Salmeterol xinafoate 25mcg TID	MDI	11
SMS20011						Salmeterol xinafoate 50mcg BID	MDI	11
SMS30001	383	18-80	47.6	42	Y	Salmeterol xinafoate 50mcg BID	DPI	189	GSK data only
SMS30001						Albuterol 400mcg QID	DPI	194
SMS30039	9	13-17	14.7	21	Unk	Salmeterol xinafoate 50mcg BID	DPI	9	GSK data only
SMS30039						Placebo		9
SMS30041	147	18-76	46.3	183	Y	Salmeterol xinafoate 50mcg BID	DPI	80	GSK data only
SMS30041						Albuterol 400mcg QID	DPI	67
SMS30068	34	18-66	42.5	56	Y	Salmeterol xinafoate 50mcg BID	MDI	23	GSK data only
SMS30068						Placebo		11
SMS30076	338	2-4	3	28	Y	Placebo		113	CTR
SMS30076						Salmeterol xinafoate 25mcg BID	MDI	112
SMS30076						Salmeterol xinafoate 50mcg BID	MDI	113
SMS30077	87	1-2	1.4	28	Y	Placebo		28	CTR
SMS30077						Salmeterol xinafoate 25mcg BID	MDI	28
SMS30077						Salmeterol xinafoate 50mcg BID	MDI	31
SMS30078	9	Unk	10.4	21	Unk	Salmeterol xinafoate 50mcg BID	DPI	9	CTR
SMS30078						Placebo		9
SMS40001	139	19-80	45	168	Y	Salmeterol 50mcg BID + Fluticasone propionate 250mcg BID	MDI + MDI	74	GSK data only
SMS40001						Fluticasone propionate 500mcg BID	MDI	65
SMS40003	481	15-82	40	84	Y	Montelukast 10mg QD	ORAL	241	Fish JE, et al. Chest 2001;120:423-430
SMS40003						Salmeterol xinafoate 50mcg BID	DPI	240
SMS40004	467	15-83	39	84	Y	Montelukast 10mg QD	ORAL	231	Fish JE, et al. Chest 2001;120:423-430
SMS40004						Salmeterol xinafoate 50mcg BID	DPI	236
SMS40012	188	Unk	40.3	182	Y	Salmeterol 50mcg BID	DPI	93	CTR
SMS40012						Placebo		95
SMS40054	59	23-75	49.6	365	Y	Salmeterol xinafoate 100mcg BID	DPI	30	GSK data only
SMS40054						Placebo		29
SMS40068	14	12-16	13.1	28	Y	Salmeterol xinafoate 50mcg QD	MDI	14	GSK data only
SMS40068						Placebo		14
SMS40081	274	17-81	46.5	85	Y	Salmeterol 50mcg BID + Fluticasone propionate 100mcg BID	DPI	30	Van Noord JA, Thorax 1999;54:207-212
SMS40081						Salmeterol 50mcg BID + Fluticasone propionate 250mcg BID	DPI	109
SMS40081						Fluticasone propionate 100mcg x2 BID	DPI	30
SMS40081						Fluticasone propionate 250mcg x2 BID	DPI	105
SMS40082	32	18-62	39.1	28	Y	Salmeterol xinafoate 50mcg BID	Unk	16	Boulet, et al. Eur Respir J 1998;11:1091-1097
SMS40082						Placebo		16
SMS40172	30	7-16	9.9	112	N	Salmeterol xinafoate 50mcg BID	DPI	15	GSK data only
SMS40172						Albuterol 200mcg BID	DPI	15
SMS40179	Unk	Unk	Unk	Unk	Unk	Salmeterol xinafoate 50mcg BID	DPI	Unk	GSK data only
SMS40179						Placebo		Unk
SMS40180	233	Unk	42	84	N	Salmeterol 50mcg BID + Beclomethasone variable BID	DPI + DPI	113	Vermetten FFAM, et al. J Asthma 1999;36:97-106
SMS40180						Beclomethasone variable BID	DPI	120
SMS40185	Unk	19-73	47	56	Unk	Salmeterol xinafoate 50mcg BID	DPI	Unk	GSK data only
SMS40185						Albuterol CR 8mg BID	ORAL	Unk
SMS40191	Unk	18-75	Unk	42	Unk	Salmeterol xinafoate 50mcg BID	DPI	Unk	GSK data only
SMS40191						Placebo		Unk
SMS40221	64	20-76	48.6	28	Unk	Salmeterol xinafoate 50mcg BID	DPI	32	Chen, et al. Thorac Med 1997;12:105-112
SMS40221						Placebo		32
SMS40230	12	Unk	20	7	N	Salmeterol 50mcg BID + Beclomethasone 500mcg BID	Unk	6	Giannini D, et al. Chest 1999;115:629-634
SMS40230						Beclomethasone 500mcg BID	Unk	6
SMS40238	116	18-68	45	84	Unk	Salmeterol xinafoate 50mcg BID	MDI	58	CTR
SMS40238						Ketotifen 1mg BID	ORAL	58
SMS40239	134	18-70	41.4	56	Y	Salmeterol xinafoate 50mcg BID	MDI	65	Bousquet J, et al. Ann Allergy Asthma Immunol 1996;76:189-94
SMS40239						Cromolyn 20mg QID	MDI	69
SMS40241	96	17-70	42	28	Y	Salmeterol xinafoate 50mcg BID	MDI	50	Muir et al, Eur Respir J 1992;5:1197-1200
SMS40241						Theophylline 300mcg BID + Ketotifen 1mg	ORAL + ORAL	46
SMS40242	149	Unk	Unk	70	Unk	Salmeterol xinafoate 50mcg BID	MDI	Unk	GSK data only
SMS40242						Theophylline 300mcg BID + Ketotifen 1mg	ORAL + ORAL	Unk
SMS40249	120	19-71	53	42	Y	Salmeterol xinafoate 50mcg BID	DPI	Unk	GSK data only
SMS40249						Albuterol 400mcg BID	DPI	Unk
SMS40250	41	Unk	Unk	Unk	Unk	Salmeterol xinafoate 50mcg BID	Unk	Unk	GSK data only
SMS40250						Beclomethasone 300mcg BID	Unk	Unk
SMS40253	522	Unk	Unk	Unk	Unk	Salmeterol xinafoate 50mcg BID	MDI	Unk	GSK data only
SMS40253						Albuterol 200mcg QID	Unk	Unk
SMS40253						Placebo		Unk
SMS40263	117	Unk	Unk	112	Y	Salmeterol xinafoate 50mcg BID	MDI	Unk	GSK data only
SMS40263						Albuterol 200mcg QID	MDI	Unk
SMS40264	69	Unk	Unk	28	Unk	Salmeterol xinafoate 50mcg BID	Unk	Unk	GSK data only
SMS40268	142	Unk	Unk	Unk	Y	Salmeterol xinafoate 50mcg BID + Beclomethasone dipropionate 1000mcg BID	Unk	Unk	GSK data only
SMS40268						Salmeterol 100mcg BID + Beclomethasone dipropionate 500mcg BID	Unk	Unk
SMS40269	194	18-66	37.4	56	N	Salmeterol 50mcg BID + Beclomethasone 500mcg BID	MDI + MDI	98	Didier A, et al. Clin Drug Invest 1997;14(1):1-11
SMS40269						Terbutaline 5mg BID + Budesonide 400mcg BID	ORAL + DPI	96
SMS40284	334	Unk	Unk	Unk	Unk	Salmeterol xinafoate 50mcg BID	Unk	Unk	GSK data only
SMS40284						Albuterol 200mcg QID	Unk	Unk
SMS40286	15	Unk	Unk	21	Unk	Salmeterol xinafoate 50mcg BID	DPI	Unk	GSK data only
SMS40286						Theophylline variable dose	ORAL	Unk
SMS40289	367	Unk	39	28	Y	Salmeterol xinafoate 50mcg BID	MDI	367	CTR
SMS40289						Albuterol 200mcg QID	MDI	367
SMS40289						Placebo		367
SMS40290	228	Unk	38.5	84	Y	Salmeterol xinafoate 50mcg BID	MDI	113	Boulet LP, et al. J Allergy Clin Immunol 1997;99:13-21
SMS40290						Albuterol 200mcg QID	MDI	115
SMS40293	159	18-67	41	14	Y	Salmeterol xinafoate 50mcg BID	MDI	84	Brambilla, et al. Allergy 1994;49:421-426
SMS40293						Terbutaline 5mg	ORAL	75
SMS40294	192	Unk	Unk	Unk	Unk	Salmeterol xinafoate 50mcg BID	MDI	Unk	GSK data only
SMS40294						Theophylline	ORAL	Unk
SN408DP02	367	20-88	57	28	Y	Salmeterol 50mcg BID	DPI	186	CTR
SN408DP02						Tulobuterol 2mg QD	Tape	181
SNS-D920619	25180	Unk	Unk	112	Y	Salmeterol xinafoate 50mcg BID	MDI	16787	Castle W, et al. Br Med J 1993;306:1034-1037
SNS-D920619						Albuterol 200mcg QID	MDI	8393
Footnote: CTR: The website address for the GSK Clinical Trials Registry is http://www.gsk-clinicalstudy register.com/
